# Supplementary material
Source: PubMed Central journal article supplement (PMC7573276)
Supplement: supp_RA120.014684_161308_1_supp_574313_q4m97b.pdf [file supp_RA120.014684_161308_1_supp_574313_q4m97b.pdf]

## Supporting Information

Alternative N-terminal regions of *Drosophila* myosin heavy chain II regulate communication of the purine binding loop with the essential light chain

**Marieke J. Bloemink<sup>1,3</sup>, Karen H. Hsu<sup>2</sup>, Michael A. Geeves<sup>1\*</sup> and Sanford I. Bernstein<sup>2\*</sup>**

<sup>1</sup>Department of Biosciences at the University of Kent, Canterbury, Kent CT2 7NJ, United Kingdom,

<sup>2</sup>Department of Biology, Molecular Biology Institute, and SDSU Heart Institute at San Diego State University, San Diego, California 92182-4614, <sup>3</sup>current address: Biomolecular Research Group, School of Natural and Applied Sciences, Canterbury Christ Church University, Canterbury CT1 1QU, United Kingdom.

Running title: *Myosin alternative N-terminal domains influence kinetics*

\*Corresponding authors: M. Geeves: M.A.Geeves@kent.ac.uk; S. Bernstein: sbernstein@sdsu.edu

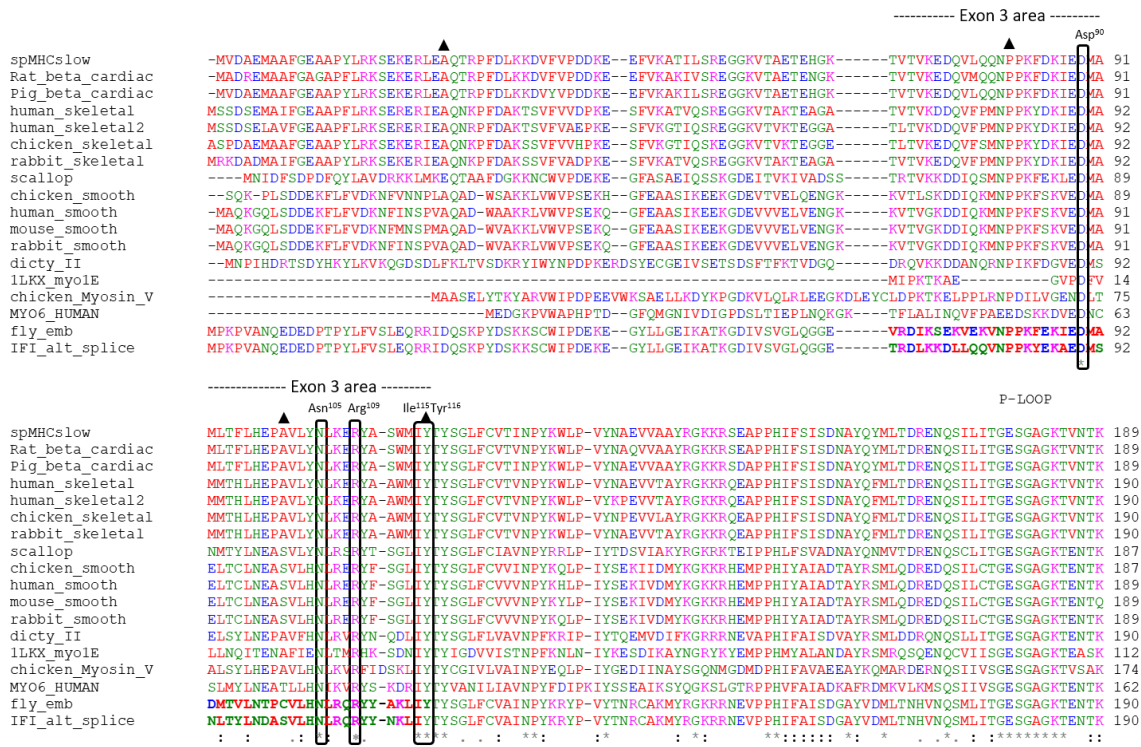

**Figure S1: Sequence alignment of the N-termini of various myosins.** Conserved residues in the exon 3-encoded region are labelled explicitly by rectangles. “\*” indicates that the residues are identical in all sequences in the alignment. “:” represents conserved substitutions, whereas “.” indicates semi-conserved substitutions. The corresponding human  $\beta$ -myosin cardiomyopathy sites in the exon 3-encoded domains (Pro81, Ala100 and Tyr115) and the short N-terminal helix (Ala26) are indicated with a ▲.

**Interaction between the exon 3 region and the purine binding loop depends on conformational state of the myosin head (Figures S2/S3).**

The rigor-like EMB crystal structure (5W1A, Figures S2A/S3A) has contacts between the exon 3 area (Tyr<sup>110</sup> and Lys<sup>113</sup>) and the purine binding loop (Asn<sup>127</sup> and Tyr<sup>132</sup>). In the pre-power stroke conformation (EMB-1QVI, figure S2B/S3B), the EMB homology structure maintains contacts between the exon 3 area (Tyr<sup>110</sup> and Tyr<sup>116</sup>) and the purine binding loop (Pro<sup>128</sup> and Tyr<sup>135</sup>). Homology models of the ADP-bound near rigor state (1S5G template, figure S2D/S3D) show that all direct contacts between the exon 3 area and the purine binding loop are lost, whereas in the post-power stroke conformation (EMB-1KK8, figure S2C/3C) contacts are maintained between exon 3 (Lys<sup>113</sup>, Tyr<sup>116</sup>) and the purine binding loop (Tyr<sup>132</sup>, Tyr<sup>135</sup>). For IFI very similar contacts are found between exon 3 and the purine binding loop (see Figure S3 for summary of interactions). Taken together, the crystal structures and homology models suggest that exon 3 is involved in regulating the conformation of the purine binding loop, as the myosin head goes through the various conformational states during the cross-bridge cycle. However, the interactions between the purine binding loop and the exon 3 area are very similar for IFI and EMB.

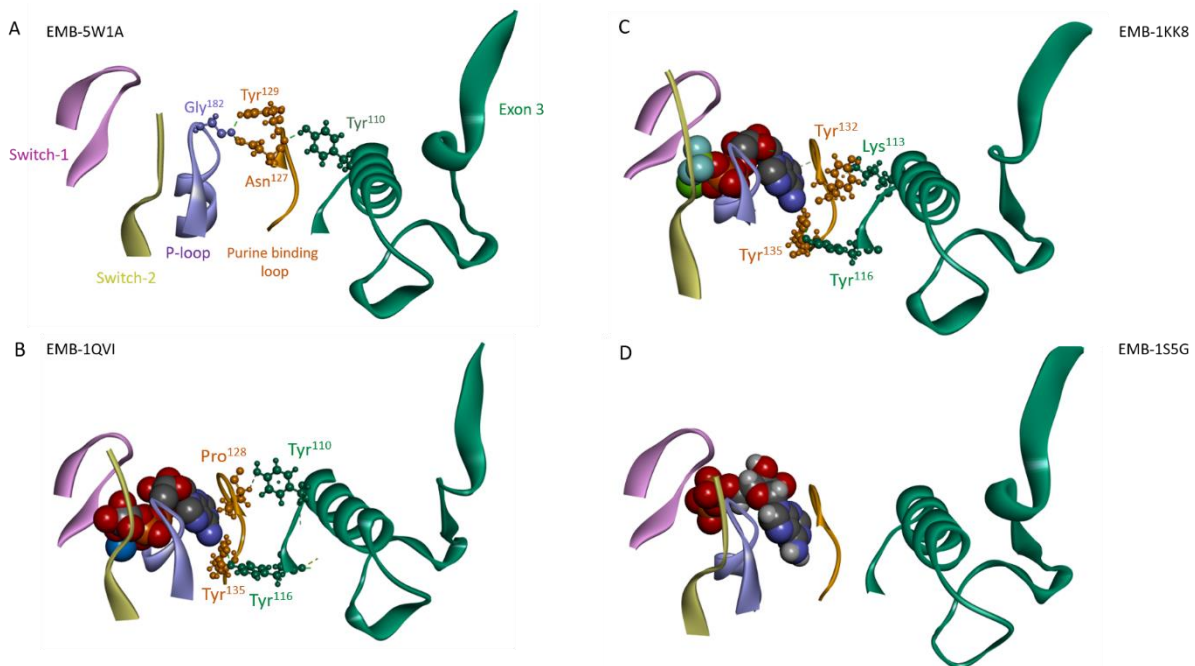

**Figure S2: Overview of exon 3 region – purine-binding loop contacts throughout the cross-bridge cycle for EMB.** (A) In the near-rigor state exon 3 residue Tyr<sup>110</sup> interacts with the purine binding loop (PDB: 5W1A). (B) In the pre-power stroke state exon 3 residues Tyr<sup>110</sup> and Tyr<sup>116</sup> both interact with the purine-binding loop (1QVI used as template). (C) In the post-power stroke state exon 3 residues Lys<sup>113</sup> and Tyr<sup>116</sup> contact the purine-binding loop (1KK8 used as template). (D) In the ADP-bound near-rigor state no contacts are seen between exon 3 and the purine-binding loop (1S5G used as template).

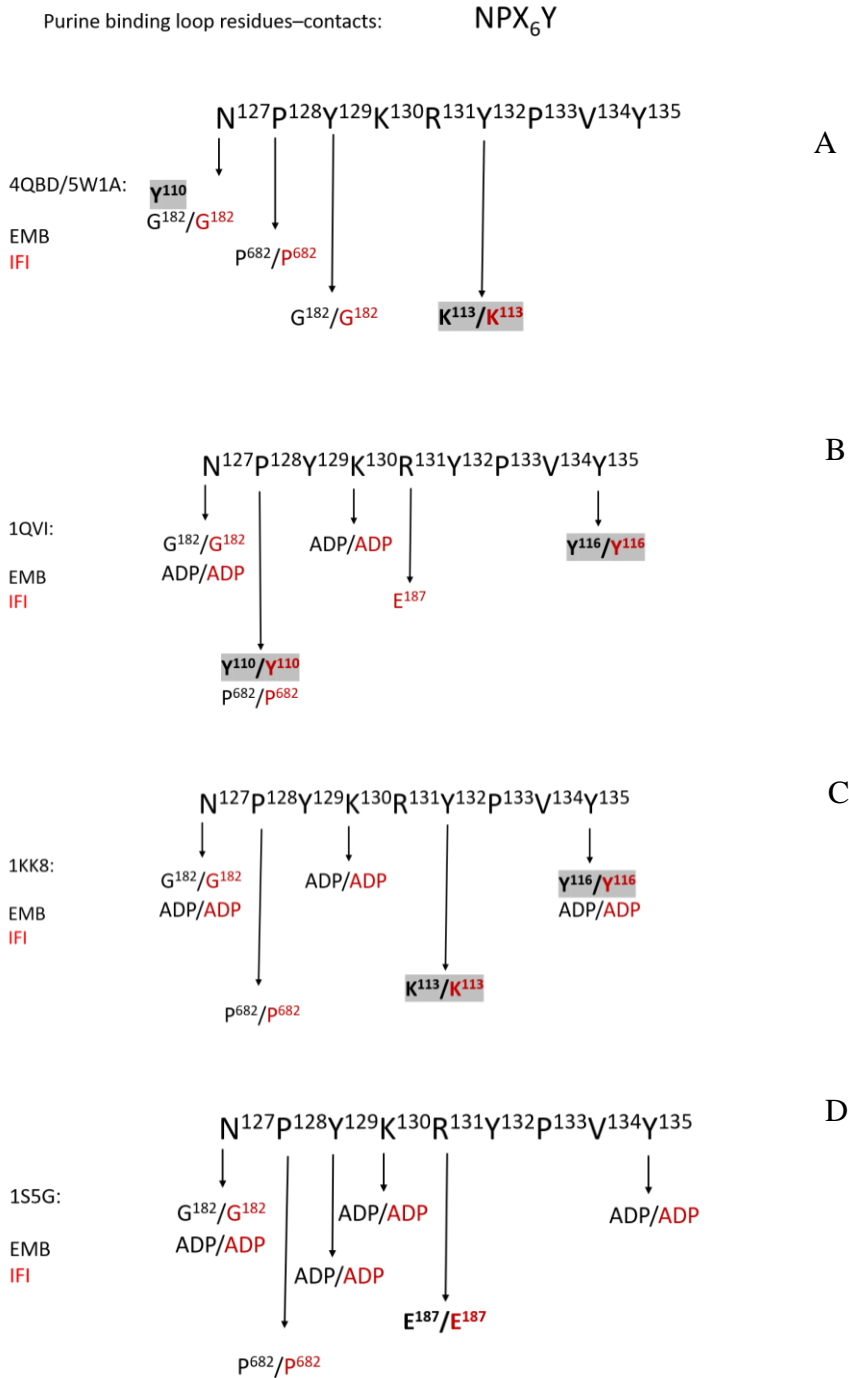

**Figure S3 Overview of purine binding loop contacts for EMB and IFI.** The purine binding loop is shown at the top of each panel (residues 127-135). Interacting EMB residues are shown below in black, IFI residues are in red. Shaded residues are in the exon 3 area. (A) **rigor-like state** using 5W1A EMB crystal structure as template for IFI. (B) **pre-power stroke state** using 1QVI as template for both EMB and IFI (C) **post-power stroke state** using 1KK8 as template (D) **ADP-bound near-rigor state** using 1S5G as template. In addition to contacts with exon 3 residues (Tyr110, Lys113 and Tyr116), the purine binding loop interacts with the P-loop (Gly182, Glu187) and the bound nucleotide (ADP).

### Interactions of the SH1-SH2 helix with the exon 3 region are conserved for IFI and EMB.

The EMB crystal structure in the rigor-like state (5W1A) shows that the exon 3 region has no direct contacts with any of the other variable domains in the myosin head (Figure 1A). However, the SH1-SH2 helix is wedged between the exon 3 and exon 9 (relay loop) regions and makes contacts with both variable domains. Since *Drosophila* EMB and IFI share the same SH1-SH2 sequence, the two variable regions could potentially interact differently with this element, thereby altering the myosin properties. An overview of interactions between SH1-SH2 and the exon 3/9 regions is summarized in Figure S4 (see below). In addition to conserved exon 3 residues L<sup>97</sup> and N<sup>98</sup>, two variable residues between EMB and IFI (A<sup>92</sup>/S<sup>92</sup> and M<sup>94</sup>/L<sup>94</sup>) interact with the SH1-SH2 region in the rigor-like state (left panel) and the pre-power stroke state (middle panel). However, for both residues it is the backbone oxygen that is involved in the contacts with the SH1-SH2 element, and thus not expected to significantly change the exon 3 – SH1-SH2 interaction. Overall for the three conformational states of the myosin molecule investigated here (near-rigor, pre-power stroke and post-power stroke state), the homology models show very similar interactions between the two *Drosophila* myosin isoforms, indicating that the interaction of exon 3 with SH1-SH2 is highly conserved for EMB and IFI.

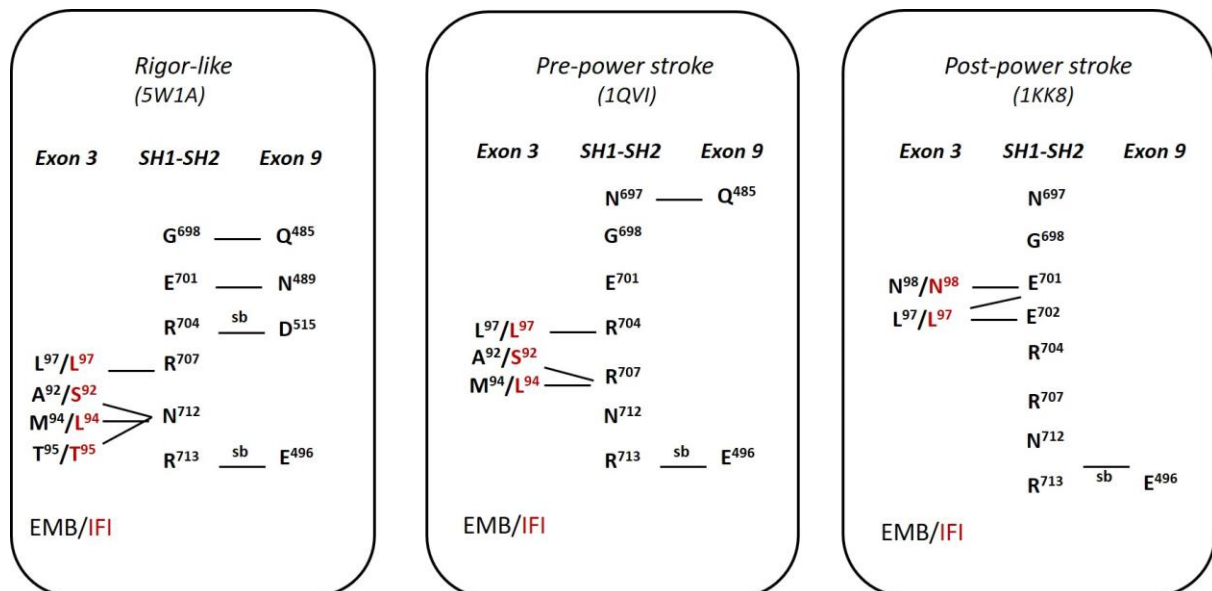

**Figure S4: Interactions of the SH1-SH2 helix with the exon 3 region are conserved for IFI and EMB.** Residues of SH1-SH2 and the exon 9-encoded relay loop are shown in black for both EMB and IFI. Exon 3 residues are shown in black (EMB) and red (IFI). Left panel: Rigor-like state using the EMB crystal structure (5W1A) as template for IFI. Middle panel: pre-power stroke state for IFI and EMB homology models based on scallop crystal structure (1QVI). Right panel: Post-power stroke state of IFI and EMB homology models based on scallop crystal structure (1KK8).

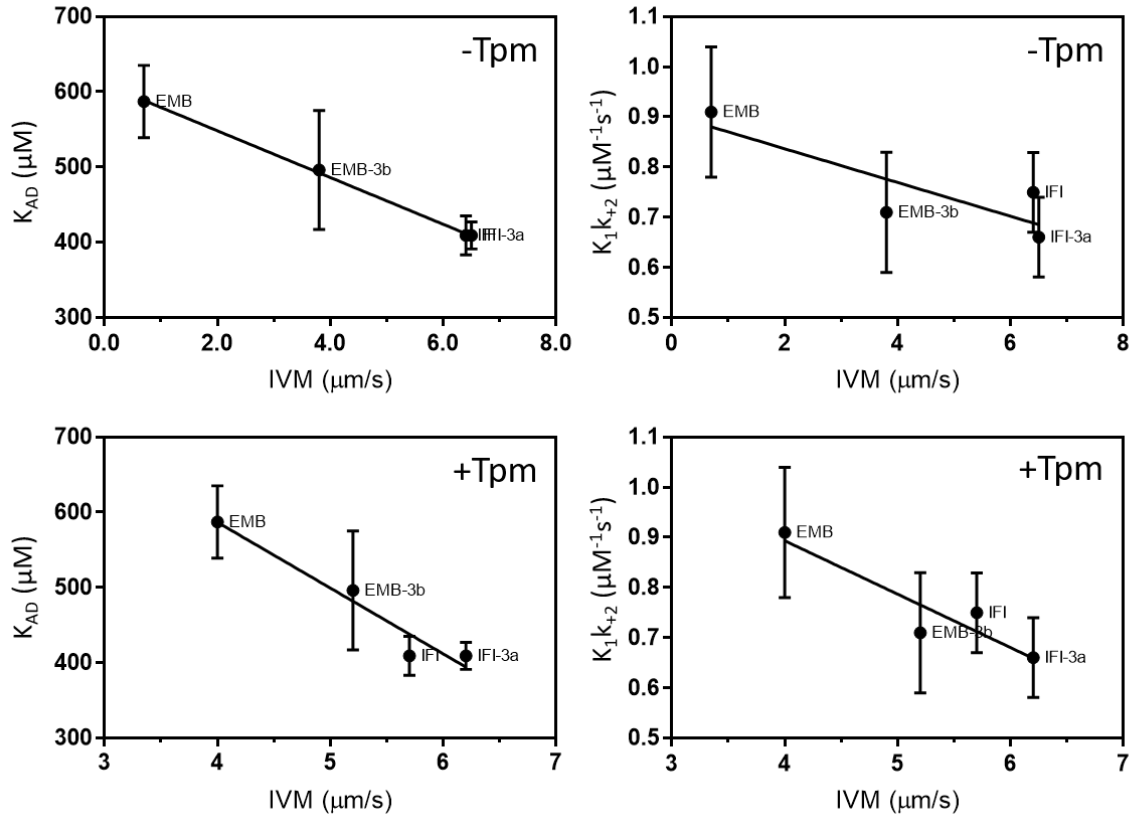

**Figure S5: Comparison of kinetic data with *in vitro* motility (IVM) as a function of  $K_{AD}$  or  $K_1k_{+2}$  for *Drosophila* myosin isoforms IFI, IFI-3a, EMB and EMB-3b.** Left two panels:  $K_{AD}$  correlation with motility; linear fits give slopes of  $-32 \pm 1$  ( $R^2=0.99$ ) and  $-88 \pm 15$  ( $R^2=0.94$ ) in the absence (-Tpm) and presence (+Tpm) of tropomyosin, respectively. Right two panels:  $K_1k_{+2}$  correlation with motility; slopes of  $-0.03 \pm 0.01$  ( $R^2=0.72$ ) and  $-0.11 \pm 0.03$  ( $R^2=0.86$ ) without and with tropomyosin respectively were determined. IVM data is from Swank *et al* 2003.

**References for supplementary materials:**

Swank, D. M., Knowles, A. F., Kronert, W. A., Suggs, J. A., Morrill, G. E., Nikkhoy, M., Manipon, G. G., and Bernstein, S. I. (2003) Variable N-terminal regions of muscle myosin heavy chain modulate ATPase rate
